# Supplementary material
Source: publisher figshare collection journal article supplement (https://rs.figshare.com/ndownloader/files/15365426)
Supplement: Supplementary file 1 [file 15365426]

## Sheet: Sheet1
Table S2. Results of chi squared tests to detect associations between cultural traits and matrilineal kinship, patrilineal kinship, matrilocal residence, and patrilocal residence. Yellow indicates significant after Holm-Bonferroni correction.
Results are presented for both the full Ethnographic Atlas (digitized in D-PLACE, 1291 populations) and the Standard Cross-Cultural Sample (186 populations).
Direction indicates whether the combination of the two traits occurred more or less frequently than expected by chance.
		D-PLACE (1291 pops)		SCCS (186 pops)		D-PLACE (1291 pops)		SCCS (186 pops)		D-PLACE (1291 pops)		SCCS (186 pops)		D-PLACE (1291 pops)		SCCS (186 pops)
		Matrilineal		Matrilineal		Patrilineal		Patrilineal		Matrilocal		Matrilocal		Patrilocal		Patrilocal
		pval	direction	pval	direction	pval	direction	pval	direction	pval	direction	pval	direction	pval	direction	pval	direction
Caste	Code: EA068 Caste differentiation: primary	0.0513044	-8.22598	0.747812	-1.07263	1.79013e-19	52.7594	0.00101853	7.70391	6.62811e-06	-20.3028	0.0266043	-4.91573	1.67771e-10	34.8807	0.0406703	5.16292
SecondaryCaste	Code: EA069 Caste differentiation: secondary features	0.0534232	2.07136	0.278212	0.698324	0.474181	0.970723	0.518932	0.385475	0.610238	-1.1945	1	-0.438202	0.682363	1.13853	1	-0.247191
Class	Code: EA066 Class differentiation: primary	0.00755069	-15.3011	0.320495	-2.93443	0.00959592	21.792	0.0162633	7.77049	6.89523e-09	-36.2525	0.0396985	-6.22951	2.58885e-10	48.4485	0.137148	4.9071
SecondaryClass	Code: EA067 Class differentiation: secondary features	0.0329536	-5.43248	0.220858	-1.91803	0.84486	-1.17153	0.385241	1.87978	0.00790162	-7.34093	0.305893	-1.77049	0.00727787	8.99544	0.169604	2.75956
Exogamous	Code: EA015 Community marriage organization	0.0599106	-10.3857	0.35762	-2.44693	3.35722e-13	56.7569	0.0102829	8.1676	0.00261211	-17.7908	0.00771707	-7.20112	5.76127e-13	51.4294	0.00015033	12.3352
Endogamous	Code: EA015 Community marriage organization	0.035408	11.3784	0.0214726	5.55307	0.313724	8.16271	0.790739	1.1676	0.251658	7.00092	0.0359644	5.79888	0.65921	-3.57706	0.321602	-3.6648
SlaveryTiming	Code: EA071 Slavery: timing	0.0100262	14.9412	0.53279	-2.05085	2.17007e-15	65.9059	0.136804	4.89831	0.0175054	-15.0687	0.142283	-4.62712	7.57607e-13	54.9367	0.207807	4.28249
Clans	Code: EA016 Organization of clan communities	0.146091	-7.19561	1	-0.374302	5.49995e-34	82.8483	0.000289217	8.76536	0.00269642	-15.5917	0.170762	-3.31844	1.63651e-12	44.2064	0.0098675	6.53073
SlaveryType	Code: EA070 Slavery: type	0.00481416	16.3201	0.53279	-2.05085	6.03936e-17	69.5371	0.136804	4.89831	0.0361466	-13.3577	0.142283	-4.62712	5.88203e-12	52.8094	0.207807	4.28249
SizeGreater400	Code: EA031 Mean size of local communities	0.0685568	-7.08911	0.813236	-0.986301	0.00261616	16.8713	0.115276	4.50685	0.00192288	-13.3839	0.293398	-2.88276	0.186213	7.46787	0.677882	-1.82069
SizeGreater5000	Code: EA031 Mean size of local communities	0.00142087	-9.9505	0.123954	-2.90411	0.0939383	7.9604	0.351213	2.54795	2.86734e-05	-14.7908	0.0905271	-3.7931	0.0680379	8.41021	1	-0.448276
JurisdictionalHeirarchy	Code: EA033 Jurisdictional hierarchy beyond local community	0.789439	2.00525	0.575744	-1.91713	8.02009e-14	63.1137	0.0125808	8.06077	0.000184287	-23.688	0.0615637	-5.76243	8.45557e-12	52.6941	0.011105	8.38674
Sedentary	Code: EA030 Settlement patterns	0.0986406	-9.24552	1	0.557377	1.167e-10	-51.8764	0.0467891	-6.28415	0.000738387	20.122	0.515587	2.36066	1.20224e-05	-32.0648	0.636677	-1.56831
ClanBarrios	Code: EA032 Jurisdictional hierarchy of local community	0.676071	-2.09091	1	-0.393443	2.2277e-06	27.4286	0.118922	3.71038	0.0323302	-9.549	0.733187	1.09836	0.00526236	15.0555	0.644215	1.42077
Agricutural	Code: EA029 Agriculture: major crop type	0.00125906	15.2833	0.717575	1.11602	1.75101e-22	67.6266	0.011601	6.9116	0.811386	-1.69416	0.578233	1.61878	0.0822615	11.2818	1	-0.80663
CerealAgriculture	Code: EA029 Agriculture: major crop type	0.449749	4.77768	0.901491	0.723757	1.56993e-17	72.9021	0.00581424	8.97238	0.00306717	-18.9003	0.314159	-3.39227	0.00365532	22.8952	0.729946	1.31492
Domestication	Code: EA040 Domestic animals: type	0.372022	5	0.470837	-2.18033	1.22066e-30	87.9452	0.000245936	10.7978	9.52277e-06	-25.0189	0.0359319	-5.91803	3.5385e-10	43.545	0.186926	3.96175
Cows	Code: EA040 Domestic animals: type	0.000329981	-20.25	0.069089	-4.7377	7.99658e-24	83.9521	2.66685e-05	13.082	1.10572e-13	-45.5818	0.00389055	-8.27869	1.74693e-12	53.5476	0.0949544	5.53005
LargeDomesticAnimals	Code: EA040 Domestic animals: type	0.000182517	-21.625	0.109525	-4.39344	1.37128e-15	68.4829	0.000128344	12.377	1.22722e-09	-38.2948	0.00206096	-9.11475	3.698e-10	48.7943	0.0700706	6.12022
Dowry	Code: EA006 Transactions at marriage: prevailing type	0.0713875	-4.32112	1	-0.173913	0.00457323	-9.51076	0.438498	-1.52174	0.0251248	-5.7498	1	-0.704918	0.543872	2.26614	0.470132	-1.07104
Brideprice	Code: EA006 Transactions at marriage: prevailing type	0.905402	1.14343	1	0.538043	8.14471e-45	114.526	0.000304715	11.4891	6.93561e-07	-29.8215	0.723316	-1.36066	9.93498e-23	72.4574	0.217242	4.56831
AgricultureTech	Code: EA028 Agriculture: intensity	0.00146354	15.0511	0.742057	1.04918	1.51795e-22	67.8007	0.010841	6.99454	0.798244	-1.7792	0.605915	1.52459	0.0791229	11.399	1	-0.644809
IrrigationAgriculture	Code: EA028 Agriculture: intensity	0.545622	2.59881	0.665782	-1.27869	0.367462	5.21465	0.304349	2.80874	0.106654	-6.71441	0.0710272	-4.18033	0.439375	-4.19437	0.927396	0.617486
IntensiveAgriculture	Code: EA028 Agriculture: intensity	0.00221342	-16.0698	0.305772	-2.85246	2.52021e-06	36.5724	0.00365419	8.98361	5.84374e-09	-33.2038	0.00156705	-8.78689	0.00859102	18.8133	0.38366	2.96721
DowryAltType	Code: EA007 Transactions at marriage: alternate type	0.566028	-1.54741	0.360993	-1.32065	0.339428	2.99283	0.141505	2.16304	0.128224	-3.39522	0.207926	-1.91803	0.139923	3.98725	0.48853	1.29508
BridepriceAltType	Code: EA007 Transactions at marriage: alternate type	0.616283	2.66135	0.619717	-1.40217	0.0102988	17.0916	0.637914	1.54348	0.498114	-3.70837	0.674994	-1.39344	0.0162883	14.6223	0.0578974	4.98361
Foraging	Code: EA142 Subsistence economy: dominant activity	0.00491864	14.5954	0.704744	-1.39674	5.46641e-30	86.5051	0.000274983	10.1848	0.00492742	-15.8626	0.0373123	-5.62295	2.32638e-07	35.6477	0.0370129	5.89071
Gathering	Code: EA042 Subsistence economy: dominant activity	0.00930993	-8.86489	1	-0.0543478	1.975e-07	-25.7376	0.200942	-2.41304	0.163246	5.36019	0.0802686	3.22951	1.27665e-07	-23.406	0.0553691	-3.24044
Fishing	Code: EA042 Subsistence economy: dominant activity	0.859331	-1.11312	0.0387186	3.21196	9.19361e-12	-36.0801	0.0711381	-3.98913	0.523493	-2.92417	0.382631	1.95082	0.657049	2.59874	0.810297	-1.04372
Hunting	Code: EA042 Subsistence economy: dominant activity	0.143123	-4.61744	0.219439	-1.76087	1.17896e-08	-24.6874	0.0194405	-3.78261	2.01299e-05	13.4265	0.719738	0.442623	0.00014349	-14.8404	0.509953	-1.60656
Pastoral	Code: EA042 Subsistence economy: dominant activity	0.320364	-3.24273	1	-0.201087	6.11141e-09	24.7031	0.104356	3.27174	0.000995477	-10.4171	0.199436	-2.40984	9.45839e-07	18.8736	0.0643143	3.85792
ExtensiveAgriculture	Code: EA042 Subsistence economy: dominant activity	2.32904e-08	32.2962	0.222336	3.19565	0.00189681	27.1681	0.9162	-0.913043	0.000522276	22.1801	0.0657241	5.21311	0.482197	5.96367	0.915392	-1.03279
IntensiveAgriculture	Code: EA042 Subsistence economy: dominant activity	0.00351796	-14.7227	0.095942	-4.21739	0.000482807	26.1548	0.0061439	8.34783	8.46275e-07	-26.9479	0.00103417	-8.93443	0.0761485	12.3491	0.288814	3.50273
MultipleSubsitence	Code: EA042 Subsistence economy: dominant activity	1	-0.243519	1	-0.0271739	0.321488	4.41084	1	-0.206522	1	-0.322275	0.64083	0.508197	0.648746	-2.12796	0.710535	-0.437158
AgriTypeUnspecified	Code: EA042 Subsistence economy: dominant activity	0.997753	0.508248	1	-0.146739	0.419165	4.06834	1	-0.315217	1	-0.35545	1	0	0.981689	0.589257	1	0
MetalWorking	Code: EA044 Sex differences: metal working	0.0723239	-9.52425	0.00624852	-7.08287	6.19649e-34	93.1558	2.40896e-05	13.4917	9.05979e-11	-38.4093	6.82528e-05	-11.55	1.3872e-16	60.1606	0.00862996	8.7
PlowCultivation	Code: EA039 Domestic animals: plow cultivation	0.000914456	-13.875	0.0210992	-4.72131	0.0383924	13.0925	0.0234475	5.85792	1.8037e-07	-23.7498	0.00279088	-6.81967	0.0337434	12.2211	0.18017	3.71585
Milking	Code: EA041 Domestic animals: milking	2.51508e-06	-25.25	0.0375107	-5.11475	1.1012e-27	86.9384	2.48749e-05	12.5683	2.87697e-17	-49.4953	0.000239641	-9.93443	1.31694e-17	61.8638	0.00227097	9.50273
LeatherWorking	Code: EA046 Sex differences: leather working	0.112621	-5.59652	1	-0.391304	0.0376134	11.481	0.246522	3.65217	0.0311604	-9.37718	0.326446	-2.6087	0.00580666	14.8067	0.0873029	5.30435
FemaleBiasMetalWorking	Code: EA046 Sex differences: leather working	0.290325	3.87658	0.122365	3.18116	1.27109e-05	-23.4177	0.237083	-3.41304	4.1881e-05	17.2092	0.182083	3.15217	0.0529273	-10.439	0.634618	-1.82609
MaleBiasMetalWorking	Code: EA046 Sex differences: leather working	0.0189777	-8.15032	0.243274	-2.4058	1.5332e-05	23.6835	0.438986	2.56522	3.95996e-05	-17.6212	0.0488176	-4.26087	0.00149943	17.1521	0.373452	3.13043
BoatBuilding	Code: EA048 Sex differences: boat building	0.267642	6.16619	0.753924	-1.26582	0.00544105	-16.7607	0.867006	-1.1519	0.693011	-2.67001	1	0.152866	0.210273	8.901	1	-0.547771
MaleBiasBoatBuilding	Code: EA048 Sex differences: boat building	0.68352	2.22063	1	-0.35443	3.68061e-05	-24.5358	0.374103	-3.20253	0.380524	-5.99426	0.932355	0.611465	0.958252	0.598278	0.650525	-2.19108
Weaving	Code: EA045 Sex differences: weaving	0.437516	-3.95714	0.343343	-2.72093	0.547976	4.72857	0.557667	2.13953	0.807201	-1.84468	0.185102	-4.17544	0.90521	1.30705	0.571929	1.96491
FemaleBiasWeaving	Code: EA045 Sex differences: weaving	0.845884	1.23333	0.679494	1.30233	0.00012584	-23.3667	0.082607	-5.34884	0.0181891	11.5197	0.942476	0.614035	0.063118	-11.1649	0.671536	-1.87719
MaleBiasWeaving	Code: EA045 Sex differences: weaving	1	0.404762	0.206616	-2.2093	4.03521e-06	21.5476	0.0440241	4.64535	0.242725	-4.6822	0.42994	-1.97661	0.0200918	10.736	0.19287	3.20468
PotteryMaking	Code: EA047 Sex differences: pottery making	0.346674	4.73923	1	-0.517857	1.79426e-08	39.156	0.243081	3.66071	0.307906	5.90654	0.496008	2.07186	0.425645	-5.73598	0.0782701	-6.11976
FemaleBiasPotteryMaking	Code: EA047 Sex differences: pottery making	0.00854201	12.6729	0.294197	2.83929	0.000182085	26.901	0.975822	0.446429	0.0240454	12.7944	0.0150379	6.83234	0.176928	-9.61916	0.0891161	-6.05389
MaleBiasPotteryMaking	Code: EA047 Sex differences: pottery making	0.0217765	-5.35506	0.37199	-1.6369	0.0973672	5.84633	0.040458	3.39881	0.166323	-3.95327	0.123161	-2.37126	0.146252	4.99299	1	-0.0479042
Fishing	Code: EA052 Sex Differences: fishing	0.0289457	9.19144	0.137178	3.19298	1.75078e-05	-25.7063	0.308838	-3.31579	0.000187918	17.0453	0.0161213	5.61765	0.0015669	-18.1168	0.340433	-3.49412
FemaleBiasFishing	Code: EA052 Sex Differences: fishing	1	0.336504	1	-0.122807	0.000218934	11.2616	0.110269	2.47368	0.247577	-3.04172	0.209443	-1.64706	0.249058	3.68653	0.711734	0.917647
MaleBiasFishing	Code: EA052 Sex Differences: fishing	0.985502	0.585018	0.84519	-1.01754	2.27072e-05	-29.736	0.294607	-3.78947	0.00748853	14.416	0.0234336	6.17647	0.0488983	-13.3886	0.146373	-5.34118
Hunting	Code: EA051 Sex differences: hunting	0.662183	1.78125	0.132857	2.67232	0.0499564	9.21875	0.447569	-2.0904	0.484126	2.91004	0.326372	2.39773	0.887141	1.09833	0.760518	-1.09091
MaleBiasHunting	Code: EA051 Sex differences: hunting	0.662183	1.78125	0.132857	2.67232	0.0499564	9.21875	0.447569	-2.0904	0.484126	2.91004	0.326372	2.39773	0.887141	1.09833	0.760518	-1.09091
FemaleBiasHouseConstruction	Code: EA049 Sex differences: house construction	0.356645	-2.76696	1	-0.554054	0.627455	-2.38087	1	0.405405	0.315734	3.60384	0.675359	-1.01351	0.12407	-6.4014	0.85552	-0.310811
MaleBiasHouseConstruction	Code: EA049 Sex differences: house construction	0.254793	4.02087	1	-0.182432	0.397472	4.62261	0.317984	-3.25676	0.0658031	-7.67539	1	0.141892	0.0227456	11.5183	0.914604	-1.23649
Gathering	Code: EA050 Sex differences: gathering	1	0.382979	0.0983522	3.9	0.00103092	-18.0213	0.0273919	-6.3	0.0525271	9.0122	0.0950679	4.56604	0.311493	-5.85366	0.77629	-1.11321
FemaleBiasGathering	Code: EA050 Sex differences: gathering	0.743974	-1.78419	0.185199	3.49375	8.50639e-06	-27.266	0.0691387	-5.64375	0.375817	4.87652	0.857173	1.06918	0.847721	1.64329	0.827005	1.45283
MaleBiasGathering	Code: EA050 Sex differences: gathering	1	0.0607903	1	-0.00625	0.0352727	6.3617	1	-0.14375	0.552804	-1.85976	0.64789	0.459119	0.804571	1.18293	1	-0.358491
SpecializedWeaving	Code: EA056 Age or occupational specialization: weaving	0.0868959	-4.4631	0.132138	-2.23256	0.00605049	10.544	0.0128775	4.88372	0.00387642	-8.78614	0.198577	-2.46199	0.0667816	6.96894	0.488337	1.7076
AgricultureForSexBias	Code: EA054 Sex differences: agriculture	0.00220893	13.8889	0.673491	1.24	4.65282e-18	57.9877	0.0136613	6.72	0.803383	1.75698	0.4289	2.18966	0.392456	5.78387	0.901184	-1.31609
FemaleBiasAgriculture	Code: EA054 Sex differences: agriculture	5.85734e-06	20.8241	0.00831159	5.76	2.77934e-05	29.0175	0.954588	-0.72	0.000124923	20.4436	0.028809	5.58621	0.586709	-3.95864	0.331344	-3.31034
MaleBiasAgriculture	Code: EA054 Sex differences: agriculture	0.408009	-4.12963	0.0515222	-4.72571	1	0.170782	0.762011	1.25143	0.00986482	-13.6205	0.219595	-3.65517	0.492842	4.76732	0.288288	3.42529
AnimalHusbandry	Code: EA053 Sex differences: animal husbandry	1	-0.322581	0.463343	-2.14286	3.12989e-22	66.4293	0.000138886	11.1056	1.95424e-06	-24.4494	0.0204071	-6.2	6.95379e-09	37.2247	0.161604	4.1
FemaleBiasAnimalHusbandry	Code: EA053 Sex differences: animal husbandry	1	-0.483871	0.248695	1.71429	1	0.0669975	0.33026	-2.26708	0.715622	-1.53933	0.0926399	2.8	1	0.158552	0.311993	-2.4
MaleBiasAnimalHusbandry	Code: EA053 Sex differences: animal husbandry	0.958973	-0.709677	0.0303995	-5.14286	1.25896e-13	50.5906	0.0401673	6.23602	0.00381041	-14.9775	0.0160727	-6.4	7.30351e-06	28.7665	0.0502958	5.95
SpecializedMetalWorking	Code: EA055 Age or occupational specialization: metal working	0.207997	-6.79463	0.0124139	-6.48619	9.9822e-32	89.5315	0.000230572	11.7514	6.52319e-09	-34.2808	0.000224298	-10.6833	5.48509e-14	54.5254	0.0292281	7.23333
SpecializedLeatherworking	Code: EA057 Age or occupational specialization: leather working	0.0174196	-6.18829	0.132555	-2.47826	7.5239e-10	24.7089	0.0116416	5.13043	5.79837e-05	-12.813	0.0236888	-3.52174	1.59368e-05	17.1379	0.329179	2.26087
SpecializedHouseConstruction	Code: EA060 Age or occupational specialization: house construction	0.163057	-2.93391	0.693183	-0.986486	0.440173	2.70609	0.913919	0.648649	0.0191155	-5.88636	0.306721	-2.12162	0.215317	4.02273	1	0.202703
SpecializedPotteryMaking	Code: EA058 Age or occupational specialization: pottery making	0.0126298	-7.31315	0.204902	-2.42262	4.77825e-05	17.4284	0.0163462	5.47024	0.000492774	-11.6589	0.0607395	-3.95808	0.00982047	10.7488	0.691168	1.26347
SpecializedBoatBuilding	Code: EA059 Age or occupational specialization: boat building	0.129419	-3.79943	0.217196	-1.74684	0.334902	-3.48711	0.33995	1.43038	0.0404573	-5.77762	0.467354	-1.67516	0.116266	5.43329	0.934659	0.585987
SpecializedAnimalHusbandry	Code: EA064 Age or occupational specialization: animal husbandry	0.267938	1.77419	1	-0.714286	0.160263	3.75434	0.039819	2.35404	0.556683	-1.46067	0.583903	-1	1	-0.380774	1	-0.25
SpecializedHunting	Code: EA062 Age or occupational specialization: hunting	0.758108	-0.997914	0.605516	-1.17514	0.000797597	8.65068	0.262158	1.46893	0.306879	-2.42408	0.20454	-1.72727	0.127341	4.01047	0.712053	0.909091
SpecializedFishing	Code: EA063 Age or occupational specialization: fishing	0.235753	-2.27705	0.595132	-0.982456	0.200852	3.64328	0.207712	1.78947	0.0490881	-4.08224	0.346906	-1.44118	0.541925	1.89631	0.709372	-0.447059
UnequalInheritanceReal	Code: EA075 Inheritance distribution for real property (land)	2.61368e-05	18.0247	0.310798	1.75	7.97786e-06	30.8816	0.738433	1.25	0.470857	-3.74229	0.849092	-0.905405	0.0205257	14.254	0.998929	-0.675676
MatrilinealInheritanceReal	Code: EA074 Inheritance rule for real property (land)	1.30029e-103	63.2822	6.85468e-08	7.63158	7.38642e-20	-41.1865	0.0183874	-4.36184	3.53173e-45	43.7967	7.66213e-07	7.77632	1.09725e-27	-43.435	0.000197064	-6.63816
PatrilinealInheritanceReal	Code: EA074 Inheritance rule for real property (land)	5.96186e-28	-51.9244	0.00776535	-5.57895	2.1716e-59	117.599	3.50957e-06	13.8421	8.94722e-37	-63.227	1.9652e-05	-10.4868	4.64959e-53	97.8865	1.67808e-07	15.4934
Games	Code: EA035 Games	0.479962	-0.76971	0.165845	-1.5124	0.550033	1.79461	0.448142	1.47934	0.0137307	-5.2183	0.246436	-1.60331	0.00040712	8.80042	0.0131251	4.19835
UnequalInheritanceMovable	Code: EA077 Inheritance distribution for movable property	0.000456722	16.3341	1	-0.471831	4.60257e-05	28.3176	0.358344	2.71127	1	0.0566038	0.586788	-1.70629	0.0111985	15.9434	0.438806	2.28671
PoliticalIntegration	Code: EA090 Political integration	0.504698	-1.17665	0.637759	-0.536585	0.224043	3.19461	0.173815	2.08943	1	-0.248503	1	0.377049	0.0764591	4.46108	0.178996	2.22951
MatrilinealInheritanceMovable	Code: EA076 Inheritance rule for movable property	5.38338e-107	75.5467	6.85906e-07	7.83893	1.57817e-24	-51.48	0.0115988	-4.79195	7.83005e-46	52.1043	1.25686e-06	8.10667	4.509e-27	-48.9423	0.00130052	-6.05333
PatrilinealInheritanceMovable	Code: EA076 Inheritance rule for movable property	5.2923e-37	-63.5889	0.00159941	-7.3557	4.29671e-62	121.033	1.26432e-07	15.1678	7.62485e-42	-71.4728	7.19521e-06	-11.4267	6.18535e-66	111.696	1.1942e-07	15.2133
PostPartumSexTaboo	Code: EA036 Post-partum sex taboos	0.603316	0.95393	0.583233	0.896226	0.720805	0.731707	1	0.556604	0.369519	1.6477	0.332262	1.22642	0.468443	1.09485	1	0.207547
SegregationBoys	Code: EA038 Segregation of adolescent boys	1.34539e-08	25.7004	0.0835506	4.09804	5.61764e-10	41.1491	0.0139261	7.2549	0.383089	4.97326	0.322903	2.96078	0.0230322	14.9091	0.708934	-1.11765
MaleGenitalMutilations	Code: EA037 Male genital mutilations	0.871567	1.3038	0.768889	-1.16022	1.75178e-27	85.2297	9.19223e-05	11.1492	9.95113e-08	-30.6379	0.00507419	-7.4	1.50267e-16	58.6706	0.000918169	9.86667
FemaleBasedResidenceFirstYears	Code: EA010 Marital residence with kin: first years	2.10748e-82	65.5791	1.57658e-12	13.5879	2.11407e-24	-52.4585	0.00552336	-6.32967	1.56204e-149	97.7806	7.04085e-22	18.0984	2.70341e-70	-82.7656	1.01041e-10	-14.5792
MaleBasedResidenceFirstYears	Code: EA010 Marital residence with kin: first years	1.89328e-45	-66.2772	1.46379e-07	-11.3242	6.11634e-39	91.8898	0.00418511	8.34066	3.62066e-52	-78.3623	4.64924e-09	-14.4098	5.5181e-131	155.52	3.84941e-20	26.5246
NuclearFamilies	Code: EA008 Domestic organization	0.808777	-1.80578	1	-0.409836	4.68635e-13	-58.9767	0.276288	-3.7541	0.0941101	10.4093	0.302068	-3.21429	3.16037e-12	-51.6533	0.153601	-5.01648
Polygamy	Code: EA008 Domestic organization	0.999086	-0.505618	0.610878	-1.42623	2.89755e-12	51.7865	0.166393	3.65574	0.00175109	-17.3355	0.158298	-3.42857	3.15132e-07	34.61	0.131763	4.04396
ExtentedFamilies	Code: EA008 Domestic organization	0.757403	2.3114	0.597201	1.83607	0.446347	7.19021	1	0.0983607	0.318686	6.92616	0.0289908	6.64286	0.0384024	17.0433	0.957949	0.972527
Monogamous	Code: EA009 Marital composition: monogamy and polygamy	0.0720586	8.18387	0.417348	1.98361	2.32313e-12	-45.4129	0.0132108	-6.59016	0.199952	6.54355	1	-0.285714	5.16273e-09	-34.6758	0.0556305	-5.48352
AltHtoWTransferofResAtMarriage	Code: EA013 Transfer of residence at marriage: alternate	0.211238	-5.3115	0.899477	0.697802	4.99725e-11	-38.5879	0.0412534	-5.24176	1.00662e-05	-19.1878	0.0710272	-4.18033	1.81944e-09	32.1215	0.00248442	7.61749
AltWtHTransferOfResAtMarriage	Code: EA013 Transfer of residence at marriage: alternate	0.00042446	10.7173	0.733043	0.32967	1.17137e-11	-30.1182	0.520343	-1.73626	1.69019e-50	48.1208	1.2879e-05	8.16393	1.34589e-48	-58.5067	2.44791e-08	-11.4098
FemaleBasedMarriageResAlt	Code: EA014 Marital residence with kin: alternate	0.242399	5.75221	0.374182	2.21429	3.29352e-12	-48.1593	0.00777463	-7.42857	3.62611e-05	-21.0859	0.0964525	-4.31148	2.69547e-11	41.8474	0.000865862	9.27869
PrimHtoWTransferofResAtMarriage	Code: EA011 Transfer of residence at marriage: prevailing pattern	3.04464e-35	40.2093	4.93738e-10	11.7363	1.89229e-21	-46.4153	0.00750601	-6.01099	2.27707e-131	86.8224	7.92611e-21	17.3115	7.4824e-62	-73.4901	3.10401e-10	-13.9454
PrimWtHTransferOfResAtMarriage	Code: EA011 Transfer of residence at marriage: prevailing pattern	2.39794e-06	-26.3387	0.00729173	-6.98352	2.02142e-91	167.802	4.77531e-10	19.8132	6.68905e-41	-81.3891	1.92378e-06	-13.7377	3.68396e-129	181.966	4.55496e-18	28.3443
PrimFemaleBasedMaritalResWithKin	Code: EA012 Marital residence with kin: prevailing pattern	2.80474e-87	85.1709	6.1109e-14	15.2143	5.88496e-44	-90.0415	0.000130452	-10.4286	7.30557e-276	167.744	1.28417e-40	30.6885	5.62129e-129	-141.986	2.22906e-19	-24.7213
PrimMaleBasedMaritalResWithKin	Code: EA012 Marital residence with kin: prevailing pattern	1.88418e-56	-84.6054	6.28198e-09	-14.0604	3.01987e-80	152.278	1.30934e-07	16.3516	5.62129e-129	-141.986	2.22906e-19	-24.7213	1.93523e-276	258.999	5.54282e-41	42.4699
PatrilinealExogamousGroups	Code: EA018 Largest patrilineal exogamous group	2.50659e-33	-71.2088	8.85366e-05	-9.53804	5.80821e-149	230.418	1.00573e-20	28.5109	3.81594e-40	-85.6661	9.42678e-05	-10.9286	2.28749e-74	146.107	1.67312e-08	17.9286
PatrilinealKinGroups	Code: EA017 Largest patrilineal kin group	3.15578e-47	-85.6515	2.63163e-06	-11.7391	1.07325e-208	274.16	3.37675e-25	32.7826	1.33837e-57	-103.494	8.19168e-07	-14.1429	9.97044e-103	172.701	7.14807e-12	22.4505
MatrilinealExogamousGroups	Code: EA020 Largest matrilineal exogamous group	5.38017e-172	124.124	1.51309e-22	19.4239	1.09239e-49	-99.1052	7.56133e-06	-11.9783	2.19759e-63	81.6842	2.8951e-13	16.8571	3.25602e-38	-78.0893	3.02882e-06	-13.011
Kindreds	Code: EA022 Secondary cognatic kin group: 1 and 2	0.245868	-2.011	1	-0.293478	0.000484764	-7.41555	1	-0.630435	0.0913918	-2.53705	1	-0.428571	0.949013	0.615139	0.530415	0.736264
Ramages	Code: EA022 Secondary cognatic kin group: 1 and 2	1	-0.377062	1	-0.146739	0.253416	-1.39042	1	-0.315217	1	-0.475697	1	-0.214286	0.201398	-1.13466	0.371585	-0.631868
MatrilinealKinGroups	Code: EA019 Largest matrilineal kin group	3.9256e-186	131.743	8.09975e-25	20.9837	1.05418e-52	-104.199	2.4305e-06	-12.9239	8.73223e-62	82.1053	8.8468e-12	16.2143	6.4554e-38	-79.2026	6.79761e-06	-12.9066
CognaticKinGroups	Code: EA021 Cognatic kin groups	7.27863e-25	-59.3244	1.93621e-07	-12.913	2.68802e-142	-218.759	3.57069e-18	-27.7391	0.0716351	11.7426	0.271675	-3.42857	1.35766e-24	-79.7378	0.113117	-5.34066
CousinMarriageSubtypePermited	Code: EA024 Cousin marriages permitted: subtypes	1.05214e-06	27.1234	0.054297	4.92486	0.306557	8.63259	0.984788	-0.745665	0.00119577	19.7965	0.0632401	5.33333	0.0786321	-13.4147	0.0479445	-7.01754
CousinMarriagePermited	Code: EA023 Cousin marriages permitted	1.05214e-06	27.1234	0.054297	4.92486	0.306557	8.63259	0.984788	-0.745665	0.00119577	19.7965	0.0632401	5.33333	0.0786321	-13.4147	0.0479445	-7.01754
MatrilinealCousinMarriagePermited	Code: EA023 Cousin marriages permitted	0.508031	2.08004	1	-0.0924855	2.21279e-07	18.5352	0.0331145	2.77457	0.713478	-1.45058	0.650681	0.444444	0.0326318	7.31977	1	0.538012
MatrilinealCousinMarriagePreferedSubtypes	Code: EA026 Cousin marriages preferred: subtypes	0.0338778	6.62006	0.117534	2.56647	0.000172512	16.3028	0.448169	2.00578	0.257417	4.07558	0.14636	3.11111	0.81113	1.43023	0.834151	-1.02339
PatrilinealCousinMarriagePreferedSubtypes	Code: EA026 Cousin marriages preferred: subtypes	0.881895	0.882353	0.121751	1.9711	5.44589e-05	15.6471	0.138177	2.86705	0.200287	-4.10756	1	0.111111	0.0110649	9.32364	0.875523	0.71345
MatrilinealCousinMarriagePrefered	Code: EA025 Cousin marriages preferred	0.0292169	6.75313	0.1035	2.72254	0.000269756	15.7348	0.666123	1.3237	0.233243	4.24128	0.108321	3.33333	0.870705	1.12984	0.69605	-1.38596
PatrilinealCousinMarriagePrefered	Code: EA025 Cousin marriages preferred	0.923422	0.749277	0.237422	1.81503	3.25044e-05	16.215	0.065314	3.54913	0.183717	-4.27326	1	-0.111111	0.00912848	9.62403	0.716289	1.07602
FemaleBiasedHereditaryPoliSuccession	Code: EA073 Political succession: hereditary succession	7.31338e-94	65.9202	2.52599e-08	9.46584	2.13456e-17	-39.6462	0.0375781	-4.2795	2.29614e-48	51.5894	6.14955e-07	9.175	1.51732e-29	-49.182	0.000190159	-7.625
MaleBiasedHereditaryPoliSuccession	Code: EA073 Political succession: hereditary succession	1.20968e-17	-44.6117	0.153679	-3.49689	1.67966e-16	62.1165	0.0192296	7.29814	2.78881e-11	-37.8028	0.0108099	-6.825	2.03919e-15	55.3803	0.000392789	11.375
ChangeMaritalResidence	Code: EA201Marital residence with kin: change after first years	0.0479106	9.65335	1	0.362637	1.10436e-07	-37.4952	0.267069	-3.10989	0.996984	0.519337	0.586094	1.90164	3.48987e-05	-26.8066	0.022923	-6.08743
FemaleBasedDescent	Code: EA043 Descent: major type	4.77331e-277	139.906	4.89508e-33	23.038	9.79115e-36	-74.0973	0.000349857	-8.51087	2.80474e-87	85.1709	6.1109e-14	15.2143	1.88418e-56	-84.6054	6.28198e-09	-14.0604
Patrilineal	Code: EA043 Descent: major type	9.79115e-36	-74.0973	0.000349857	-8.51087	3.77372e-278	316.766	3.99792e-41	39.7174	5.88496e-44	-90.0415	0.000130452	-10.4286	3.01987e-80	152.278	1.30934e-07	16.3516
FemaleBiasedPoliSuccession	Code: EA072 Political succession	7.31338e-94	65.9202	2.52599e-08	9.46584	2.13456e-17	-39.6462	0.0375781	-4.2795	2.29614e-48	51.5894	6.14955e-07	9.175	1.51732e-29	-49.182	0.000190159	-7.625
MaleBiasedPoliSuccession	Code: EA072 Political succession	1.20968e-17	-44.6117	0.153679	-3.49689	1.67966e-16	62.1165	0.0192296	7.29814	2.78881e-11	-37.8028	0.0108099	-6.825	2.03919e-15	55.3803	0.000392789	11.375
MurdockMatrlinealSuccession	Code: EA094 Political succession: version from Murdock (1957)	5.38376e-15	17.041	1.48553e-05	6.21053	4.13512e-05	-10.5904	0.0171661	-3.57895	2.59008e-15	16.959	1.34889e-05	6.92035	6.90115e-10	-15.942	0.000576277	-6.11504
MurdockPatrlinealSuccession	Code: EA094 Political succession: version from Murdock (1957)	2.16414e-07	-15.7031	0.0143456	-5.00877	2.15489e-05	17.9693	0.0741851	4.98246	1.28515e-07	-18.587	0.000783779	-8.06195	2.79125e-10	26.4983	1.35748e-05	12.1327
RigidSocialStructure	Code: EA113 Societal Rigidity	1	0.1875	1	0	1	0.46875	0.545455	0.5	1	0.375	0.490909	0.4	0.401187	-1.15625	0.490909	-1.1
HighGods	Code: EA034 Religion: high gods	0.0871717	-7.52288	0.712236	-1.28485	1.8412e-11	44.9739	0.277029	3.84242	0.0001751	-17.5763	0.384239	-2.66265	5.78053e-08	32.5124	0.127297	5.42169
TranceStates	Code: EA112 Trance states	0.866743	1.05054	0.728315	-0.36	0.0813331	-8.87749	0.549772	1.64	0.140849	6.04573	0.364744	1.7651	0.157527	-6.98933	0.354208	-2.16107
